# Supplementary material
Source: PubMed Central journal article supplement (PMC10991337)
Supplement: 262_2020_2648_MOESM1_ESM.pdf [file 262_2020_2648_MOESM1_ESM.pdf]

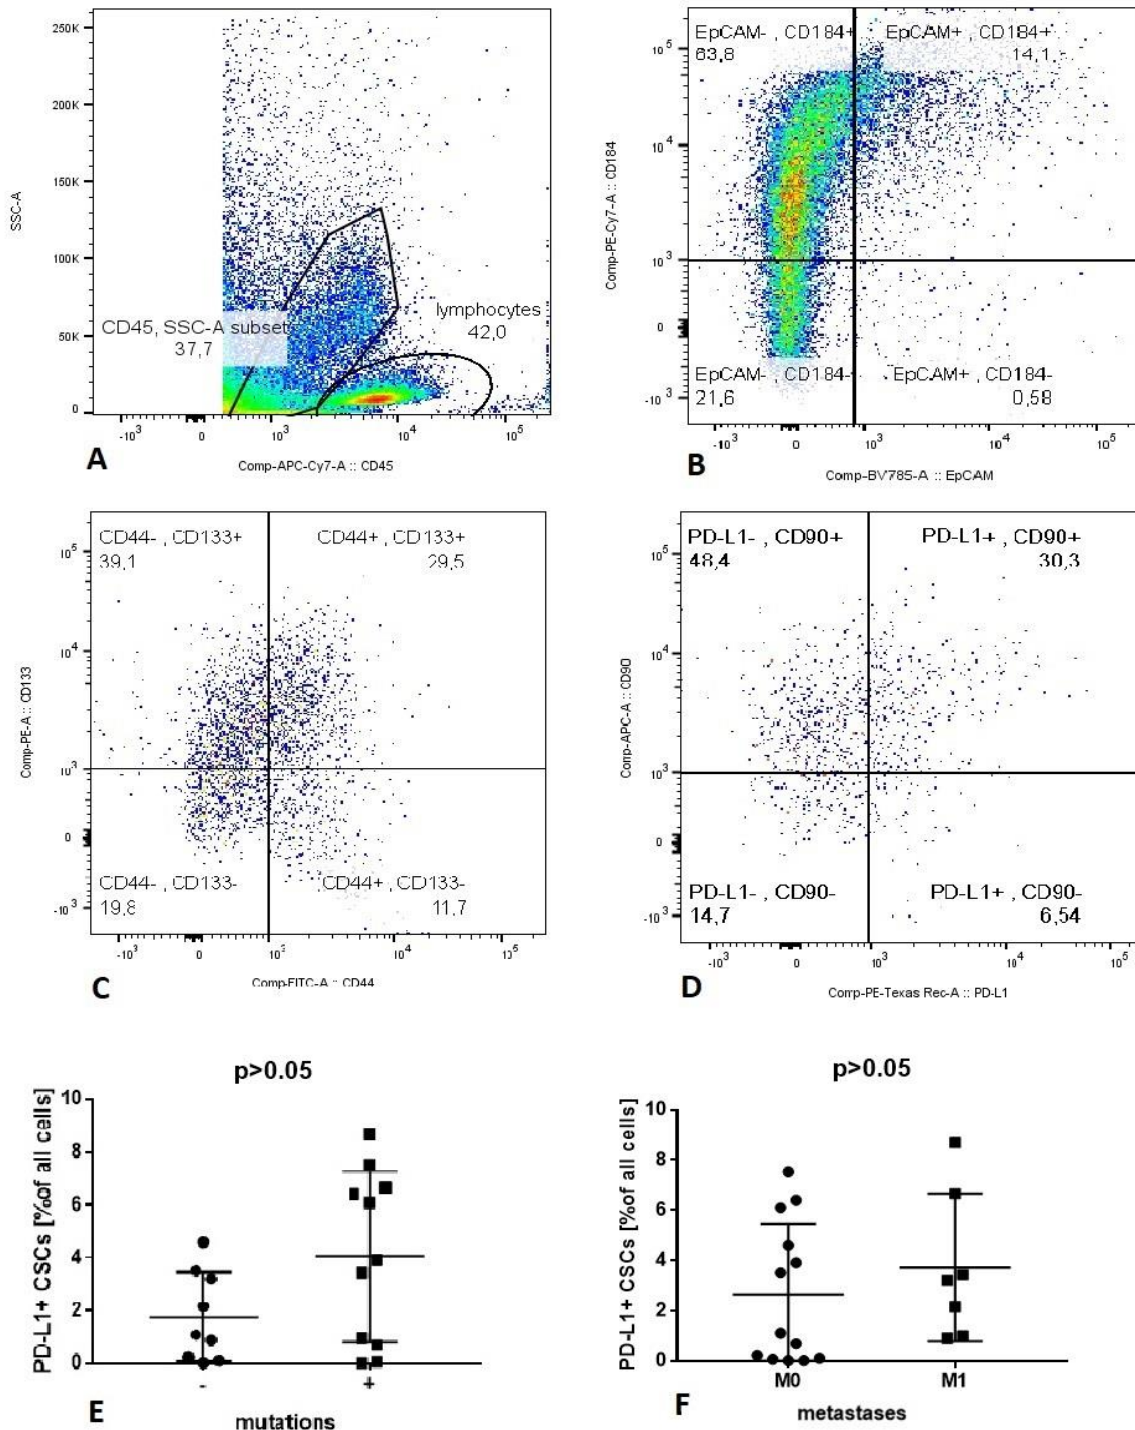

Supplementary Figure 1. The gating strategy of cancer cells and CSCs in LN aspirates. A) The population of CD45- cells (non-lymphoid origin). B) CD45-/CD184+/EpCAM+ gate – cancer cells (14,1% of all cells). C) Among cancer cells 29,5% cells express markers of stemness: CD44 and CD133. D) Among CD45-/CD184+/EpCAM+/CD44+/CD133+ cells 75% of cells express additional marker of stemness CD90. CSCs represent 3,5% of all cells in LN aspirate. Finally, 36,5% of CSCs are PDL-1+. PDL-1+. CSCs represent 1,5% of all cells in LN aspirate. E) The highest frequencies of PD-L1+ CSCs were observed in patients with confirmed mutations ( $p=0.465$ ; not significant) F) The frequencies of PD-L1+ CSCs in patients with positive metastatic disease versus patients with no metastatic disease.

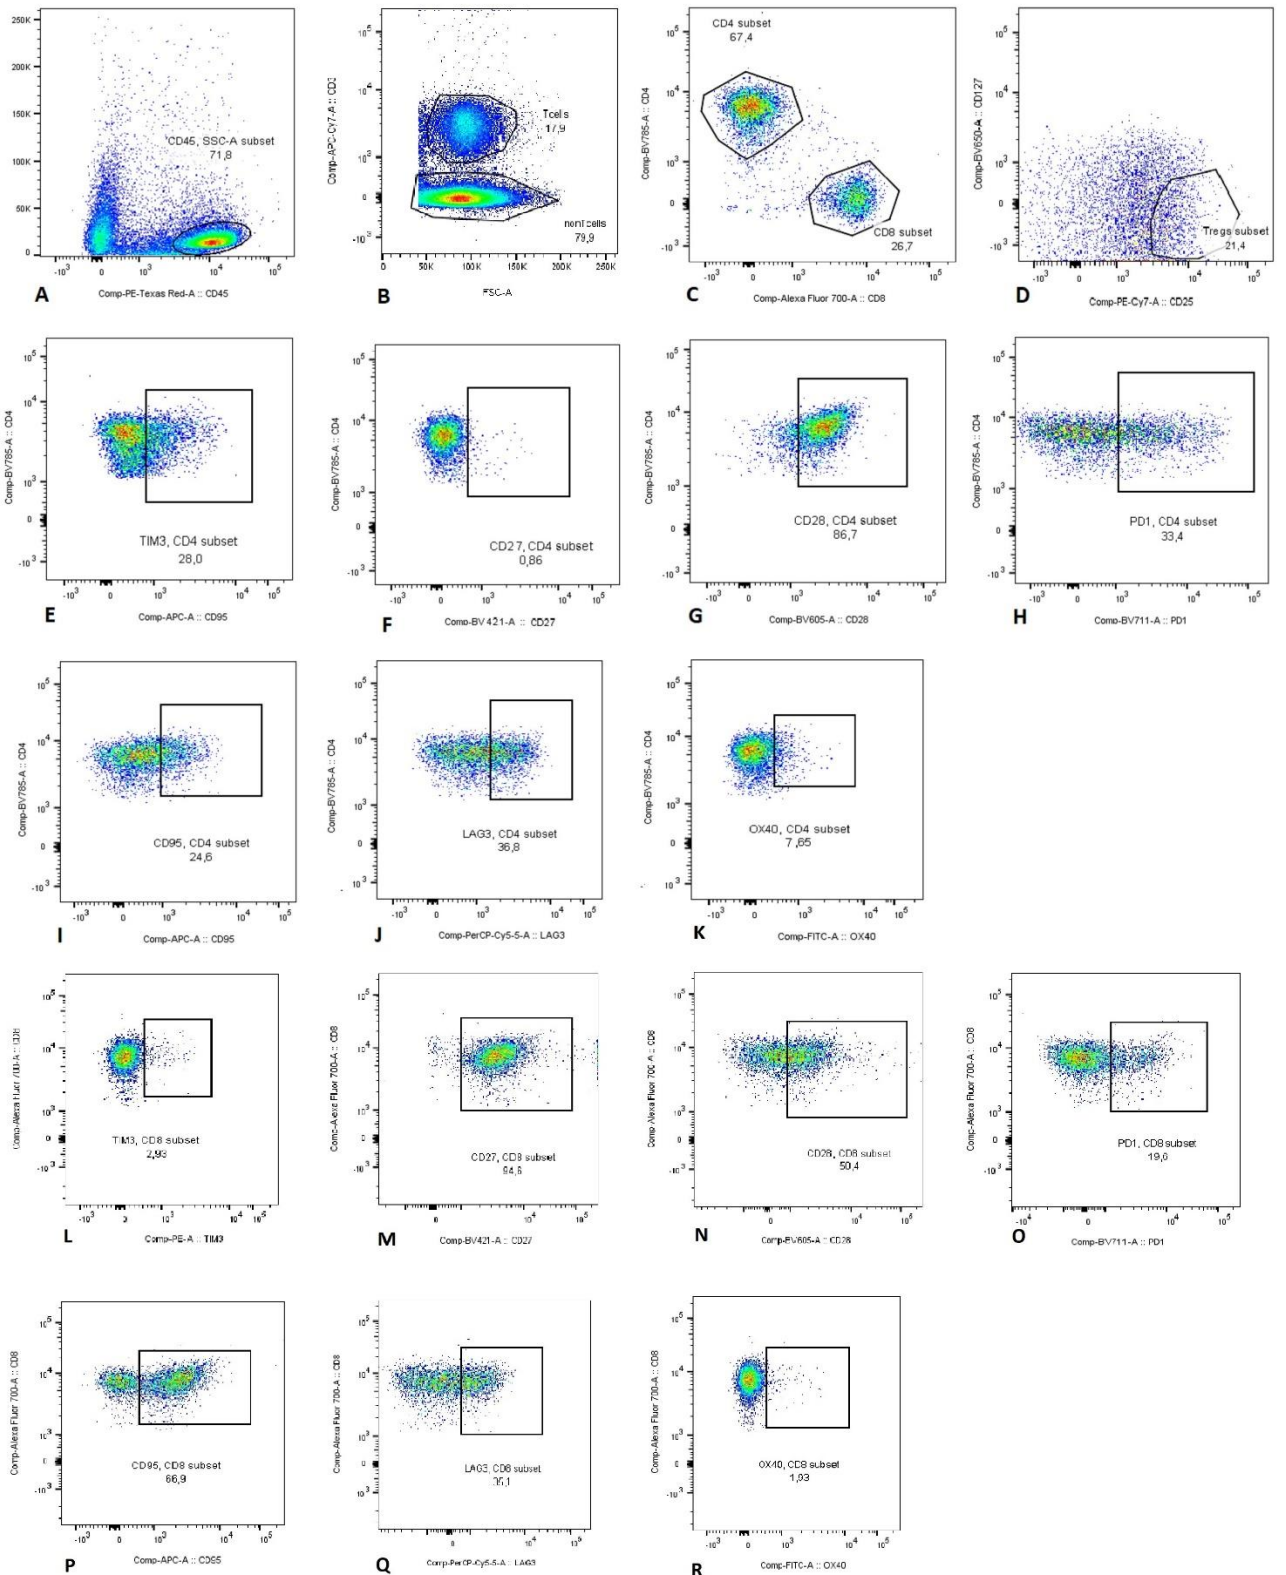

Supplementary Figure 2. Lymphocyte gating strategy. A-D) Distinguishing main lymphocyte subsets: T cells, CD4 T cells, CD8 T cells and Tregs. E-K) Gating CD4+ T cells positive for immunomodulatory molecules. L-R) Gating CD8+ T cells positive for immunomodulatory molecules.

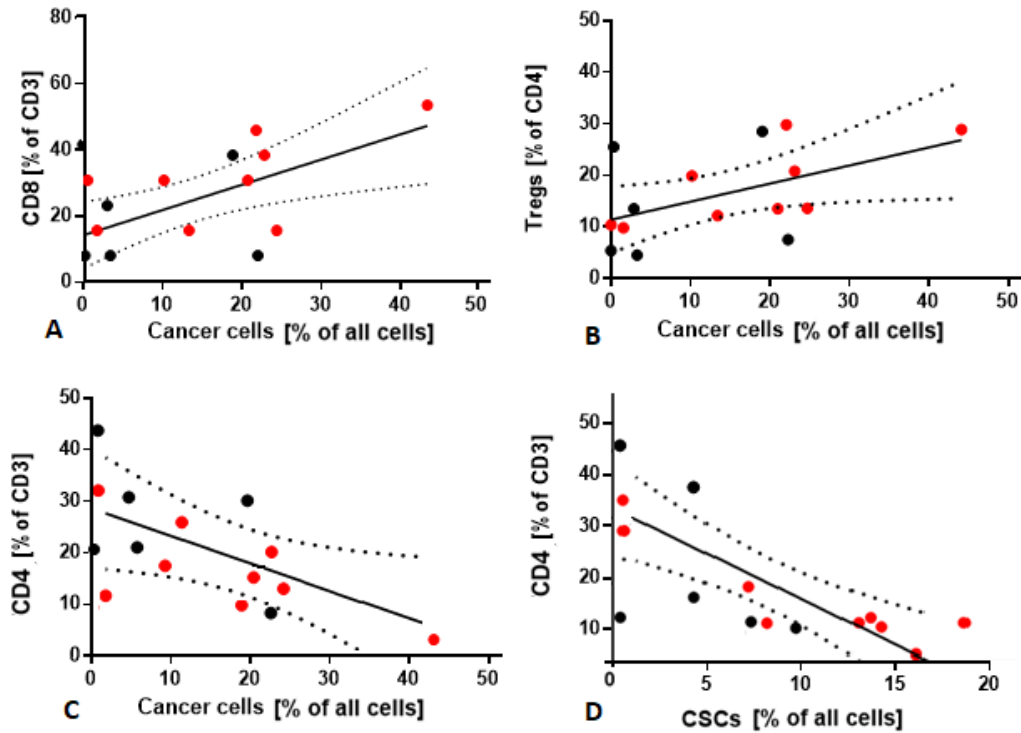

Supplementary figure 3. Correlations between cancer cells, CSCs and T cell subsets in metastatic LNs. Red dots are representative for patients with confirmed mutations. A) Cancer cells are positively correlated with CD8 T cells.  $r=0.6025$ ,  $p=0.0174$ . B) Cancer cells are positively correlated with Tregs  $r=0.5317$ ,  $p=0.0436$ . C) Cancer cells are negatively correlated with CD4 T cells.  $r=-0.5989$ ,  $p=0.0303$  D) CSCs are negatively correlated with CD4 T cells  $r=-0.6320$   $p=0.0253$

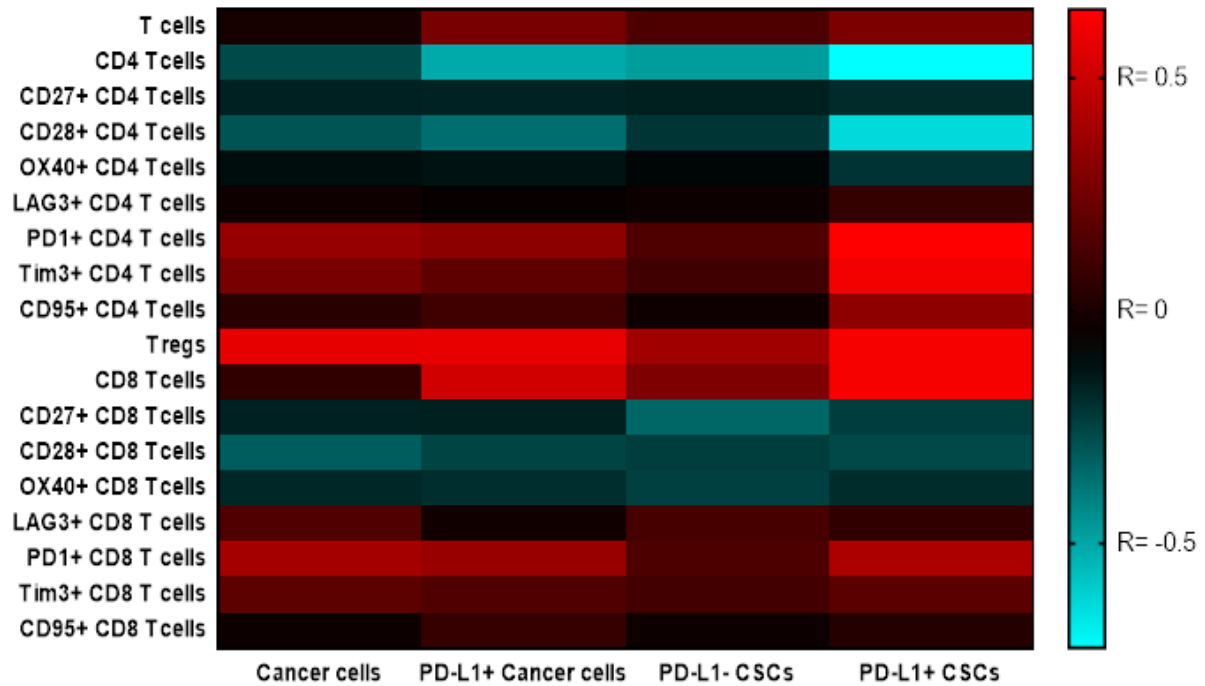

Supplementary figure 4 . A heatmap of Pearson correlation coefficients in R values over all investigated lymphocyte subpopulations and cancer cells subpopulations (described as a percentage of all cancer cells). The percentage of cancer cells positively correlated with the percentage of Tregs ( $r=0.5862$ ,  $p=0.0362$ ). PD-L1+ cancer cells positively correlated with Tregs ( $r=0.5885$ ,  $p=0.0291$ ) and CD8 T cells ( $r=0.52677$ ). PD-L1+ CSCs correlated positively with the percentage of CD8+ T cells ( $r=0.6225$ ,  $p=0.0298$ ), Tregs ( $r=0.6257$ ,  $p=0.0280$ ), PD-1+ CD4+ T cells ( $r=0.6474$ ,  $p=0.0233$ ), and Tim3+ CD4+ T cells ( $r=0.6161$ ,  $p=0.0198$ ). PD-L1+ CSCs negatively correlated with CD4+ T cells and CD28+ CD4+ T cells ( $r= -0,7243$ ,  $p=0.0095$  and  $r= -0,6204$ ,  $p=0.0236$  respectively).

|     | metastases | Histological subtype | TNM      | Stage | Sex | Age | NGS result                                                                                       | Pack years | treatment | follow-up |
|-----|------------|----------------------|----------|-------|-----|-----|--------------------------------------------------------------------------------------------------|------------|-----------|-----------|
| 1.  | 0          | SQCLC                | T4N0M0   | IIIC  | F   | 59  | 0                                                                                                | 80 (ex)    | C-R       | NE        |
| 2.  | 0          | NOS                  | T1bN1M0  | IIB   | F   | 64  | 0                                                                                                | 0          | C         | PD        |
| 3.  | 0          | ASC                  | T2N1M0   | IIB   | M   | 65  | 0                                                                                                | 30         | C         | PR        |
| 4.  | 0          | ADC                  | T2bN0M0  | IIA   | M   | 63  | KRAS exon2: c.38G>A,                                                                             | 70         | none      | PR        |
| 5.  | 0          | ADC                  | T1aN0M0  | IA    | M   | 56  | PIK3CA c.3140A>G, p.H1047R                                                                       | 50         | none      | PR        |
| 6.  | 1          | SQCLC                | T2N2M1   | IV    | M   | 72  | 0                                                                                                | 0          | C         | PD        |
| 7.  | 1          | SQCLC                | T4N3M0   | IIIC  | M   | 69  | 0                                                                                                | 64 (ex)    | C         | PD        |
| 8.  | 1          | ADC                  | T4N1M1   | IV    | M   | 78  | TP53 exon 5: c.473G>T; p.R158L<br>HER2 amplification                                             | 70         | C-R       | PD        |
| 9.  | 1          | ADC                  | T4N1M0   | IIIA  | F   | 65  | KRAS exon 2: c.34G>T; p.G12C<br>TP53 exon 6: c.594del; p.G199Efs*48                              | 90         | C-I       | PD        |
| 10. | 1          | ADC                  | T3N3M0   | IIIB  | F   | 40  | HER2 exon 20: c.2313_2324dup; p.Y772_A775dup                                                     | 0          | C-I       | PD        |
| 11. | 1          | ADC                  | T4N1M0   | IIIA  | F   | 76  | KRAS exon 2 + EGFR exon 21 c.2573T>G                                                             | 60         | TKI       | PD        |
| 12. | 1          | ADC                  | T4N2M1   | IV    | F   | 71  | KRAS exon 2: c.35G>C;                                                                            | 60         | C-R       | PR        |
| 13. | 1          | ADC                  | T4N3M1   | IV    | M   | 71  | MET exon 14: c.3082+1_3082+3delinsTT; p.?, MET<br>exon 19: c.3736G>A; p.D1246N.                  | 50 (ex)    | I         | PR        |
| 14. | 1          | ADC                  | T2aN2M1  | IV    | M   | 63  | EGFR ex19; c.2235_2249del; p.Glu746_Ala750del                                                    | 50         | TKI       | PR        |
| 15. | 1          | LCNEC                | T1N2M0   | IIIA  | M   | 86  | TP53 exon 8: c.845G>C; p.R282P<br>TERT promotor: n.*1095475G>A, GNAQ exon 5:<br>c.674C>G; p.S225 | 0          | C         | PR        |
| 16. | 1          | SQCLC                | T2aN2M1a | IVA   | M   | 62  | 0                                                                                                | 30         | C         | SD        |
| 17. | 1          | SQCLC                | T2aN1M0  | IIB   | M   | 77  | 0                                                                                                | 80         | C         | SD        |
| 18. | 1          | ADC                  | T2aN3M0  | IIIB  | F   | 58  | 0                                                                                                | 0          | C         | SD        |
| 19. | 1          | ADC                  | T3N3M0   | IIIC  | F   | 70  | HER2exon 20: A775_G776insYVMA                                                                    | 50         | C         | SD        |
| 20. | 1          | ASC                  | T3N2M1   | IV    | M   | 73  | 0                                                                                                | 48         | none      | NE        |

Supplementary Table 1. Patient characteristics. PR = partial response, SD = stable disease, PD = progressive disease, NE = not evaluable; C = Chemotherapy, TKI = tyrosine kinase inhibitor, I = immunotherapy, C-I = combined chemo- and immunotherapy, C-R = combined chemo- and radiotherapy; ADC- adenocarcinoma, SQCLC- squamous cell carcinoma, ASC- adenosquamous carcinoma, LCNEC- large cell neuroendocrine carcinoma, NOS- not otherwise specified

|                       |                        |                                  |
|-----------------------|------------------------|----------------------------------|
| Coding sequence       | CDKN2A                 |                                  |
|                       | PTEN                   |                                  |
|                       | TP53                   |                                  |
| Mutation hotspots     | AKT1 (exon 3)          | IDH2 (exon: 4)                   |
|                       | ALK (exon: 20, 22-25)  | KIT (exon: 8, 9, 11, 13, 14, 17) |
|                       | APC (exon 14)          | KRAS (exon: 2,3,4)               |
|                       | ARAF (exon 7)          | MAP2K1 (exon: 2 and 3)           |
|                       | BRAF (exon: 11, 15)    | MET (exon: 2, 14, 19)            |
|                       | CTNNB1 (exon: 3, 7, 8) | MYD88 (exon 5)                   |
|                       | EGFR (exon: 18-21)     | NOTCH1 (exon: 26, 27)            |
|                       | HER2 (exon: 19-21)     | NRAS (exon: 2,3,4)               |
|                       | EZH2 (exon: 16)        | PDGFRA (exon: 12, 14, 18)        |
|                       | FBWX7 (exon: 9, 10)    | PIK3CA (exon: 10 and 21)         |
|                       | FGFR1 (exon: 4, 7, 12) | POLD1 (exon: 12)                 |
|                       | FGFR2 (exon: 7, 9, 12) | POLE (exon: 9, 13)               |
|                       | FGFR3 (exon: 7, 9)     | RAF1 (exon: 7)                   |
|                       | FOXL2 (exon 1)         | RET (exon: 11, 16)               |
|                       | GNA11 (exon: 4, 5)     | RNF43 (exon: 3, 4, 9)            |
|                       | GNAQ (exon: 4, 5)      | ROS1 (exon: 38, 41)              |
|                       | GNAS (exon: 8, 9)      | SMAD4 (exon: 3, 9, 12)           |
|                       | HRAS (exon: 2,3,4)     | STK11 (exon: 4, 5, 8)            |
|                       | IDH1 (exon: 4)         |                                  |
| In situ hybridization | NTRK1                  |                                  |
|                       | ROS1                   |                                  |
|                       | RET                    |                                  |
|                       | MET                    |                                  |
| Immunohistochemistry  | ALK gene rearrangement |                                  |

Supplementary Table 2. Targeted NGS Custom made diagnostics V4 panel

| <b>Target</b> | <b>Conjugate</b> | <b>Company</b> | <b>Clone</b> |
|---------------|------------------|----------------|--------------|
| CD44          | FITC             | BD Biosciences | L178         |
| CD133         | PE               | BD Biosciences | W6B3         |
| CD184 (CXCR4) | PE-Cy7           | BD Biosciences | I2G5         |
| CD90          | APC              | BD Biosciences | 5E10         |
| CD326 (EpCAM) | BV785            | Biolegend      | 9C4          |
| CD45          | APCeF700         | eBioscience    | HI30         |
| PD-L1         | PeCf594          | BD Biosciences | M1H1         |

Supplementary Table 3. Antibodies used for flow cytometry identification of PD-L1+ CSCs

| <b>Target</b> | <b>Conjugate</b> | <b>Company</b> | <b>Clone</b> |
|---------------|------------------|----------------|--------------|
| CD45          | PeCf594          | BD Biosciences | HI30         |
| CD3           | APCeF700         | eBioscience    | UCHT1        |
| CD8           | AF700            | Biolegend      | SK1          |
| CD4           | BV785            | BD Biosciences | M-A251       |
| CD134 (OX40)  | FITC             | BD Biosciences | ACT35        |
| CD366 (TIM3)  | PE               | Biolegend      | F38-2E2      |
| CD223 (LAG3)  | PerCp-Cy5.5      | Biolegend      | C9B7W        |
| CD95 (FAS)    | APC              | eBioscience    | DX2          |
| CD27          | BV421            | BD Biosciences | M-T272       |
| CD28          | BV605            | BD Biosciences | CD28.2       |
| CD127         | BV650            | BD Biosciences | hIL7R-M21    |
| CD279 (PD-1)  | BV711            | BD Biosciences | EH12.1       |

Supplementary Table 4. Antibodies used for flow cytometry analysis of lymphocyte repertoire.
